# Supplementary material for: Atrophy of Foot Muscles in Diabetic Patients Can Be Detected With Ultrasonography
Source: Oxford University Press journal article supplement (doi:10.2337/dc07-0108), 2007-11-27
Supplement: dc070108onlineappentab3.doc [file dc070108onlineappentab3.doc]

Table 3

Correlations between muscle size and severity of neuropathy in all diabetic patients and in neuropathic (+DNP) and non-neuropathic (-DNP) patients.

|  | **U-EDBt** | | **U-MILt** | | **MRI-FMvol** | | **NRSS** | |
| --- | --- | --- | --- | --- | --- | --- | --- | --- |
| **U-EDBCSA** | **0.94** | * | **0.77** | * | **0.74** | * | **-0.76** | * |
| + DNP | 0.93 | * | 0.70 | † | 0.69 | † | -0.81 | * |
| - DNP | 0.86 | * | 0.79 | * | 0.60 | ‡ | -0.91 | * |
| **U-EDBt** | **....................** | | **0.79** | * | **0.77** | * | **-0.73** | * |
| + DNP | .................... | | 0.77 | * | 0.76 | * | -0.88 | * |
| - DNP | .................... | | 0.64 | ‡ | 0.61 | ‡ | -0.87 | * |
| **U-MILt** | **..................................** | | | | **0.71** | * | **-0.71** | * |
| + DNP | .................................. | | | | 0.73 | † | -0.98 | * |
| - DNP | .................................. | | | | 0.30 | ns. | -0.93 | * |
| **MRI-FMvol** | **..................................................** | | | | | | **-0.65** | ‡ |
| + DNP | .................................................. | | | | | | 0.78 | * |
| - DNP | .................................................. | | | | | | 0.48 | ns. |

Values are coefficients of correlation

*p<0.001, †p<0.01, ‡p<0.05

U-EDBCSA, cross-sectional area of extensor digitorum brevis muscle; U-EDBt, thickness of extensor digitorum brevis muscle; U-MILt, thickness of muscles at the first interstitium; MRI-FMvol, total volume of all foot muscles; NRSS, neuropathy rank sum score.
