# Supplementary material for: Atrophy of Foot Muscles in Diabetic Patients Can Be Detected With Ultrasonography
Source: Oxford University Press journal article supplement (doi:10.2337/dc07-0108), 2007-11-27
Supplement: dc070108suppfiglegend.doc [file dc070108suppfiglegend.doc]

Figure 2. Online publication only

1. Relationship between cross sectional area of the extensor digitorum brevis muscle and volume of foot muscles determined by magnetic resonance imaging (MRI-FMvol). **(B)** Relationship between cross sectional area of the extensor digitorum brevis muscle and Neuropathy Rank Sum Score (NRSS) (online appendix only)
